# Supplementary material
Source: PubMed Central journal article supplement (PMC4975830)
Supplement: gutjnl-2014-308553-s2.pdf [file gutjnl-2014-308553-s2.pdf]

## List of Abbreviations:

|                     |                                                              |
|---------------------|--------------------------------------------------------------|
| ACh:                | acetylcholine                                                |
| ADP:                | adenosine diphosphate                                        |
| AP:                 | acute pancreatitis                                           |
| ATP:                | adenosine triphosphate                                       |
| BAPTA:              | 1,2-bis(o-aminophenoxy)ethane-N,N,N',N'-tetraacetic acid     |
| Bcl2:               | B-cell lymphoma 2                                            |
| BKA:                | bongkrelic acid                                              |
| CCCP:               | carbonyl cyanide <i>m</i> -chlorophenyl hydrazone            |
| CCK:                | cholecystokinin                                              |
| CDE:                | choline-deficient ethionine-supplemented                     |
| CER:                | caerulein                                                    |
| CYA:                | cyclosporin A                                                |
| CypD:               | cyclophilin D                                                |
| DCFDA:              | dichlorodihydrofluorescein diacetate acetyl ester            |
| DEB025:             | alisporivir                                                  |
| EGTA:               | ethylene glycol tetraacetic acid                             |
| ELISA:              | enzyme-linked immunosorbent assay                            |
| ERK:                | extracellular-signal regulated kinase                        |
| FAEE:               | fatty acid ethyl ester                                       |
| GFP:                | green fluorescent protein                                    |
| H&E:                | haematoxylin and eosin                                       |
| ICl <sub>Ca</sub> : | calcium-activated Cl <sup>-</sup> currents                   |
| IMM:                | inner mitochondrial membrane                                 |
| IP <sub>3</sub> :   | inositol trisphosphate                                       |
| IP <sub>3</sub> R:  | inositol trisphosphate receptor                              |
| LC3:                | microtubule-associated protein 1A/1B-light chain 3           |
| MEN:                | menadione                                                    |
| MPTP:               | mitochondrial permeability transition pore                   |
| NAADP:              | nicotinic acid adenine dinucleotide phosphate                |
| NAD(P)H:            | nicotinamide adenine dinucleotide (phosphate)                |
| NFAT:               | nuclear factor of activated T-cells                          |
| PGAM5:              | phosphoglycerate mutase family member 5                      |
| PI:                 | propidium iodide                                             |
| POA:                | palmitoleic acid                                             |
| POAEE:              | palmitoleic acid ethyl ester                                 |
| PPI:                | peptidyl-prolyl isomerase                                    |
| <i>Ppif</i> :       | peptidyl-prolyl isomerase F (also known as D) gene           |
| R110:               | rhodamine 110                                                |
| ROS:                | reactive oxygen species                                      |
| RyR:                | ryanodine receptor                                           |
| SO:                 | sytox orange                                                 |
| SQSTM1:             | sequestosome 1 (also known as p62)                           |
| TLCS:               | tauroithocholic acid sulphate                                |
| TMRM:               | tetramethyl rhodamine methyl ester                           |
| TPP:                | tetraphenyl phosphonium                                      |
| TRO40303:           | 3,5-Seco-4-nor-cholestan-5-one oxime-3-ol                    |
| TUNEL:              | terminal deoxynucleotidyl transferase dUTP nick end labeling |
| Wt:                 | wild type                                                    |
