# Supplementary material
Source: PubMed Central journal article supplement (PMC4975830)
Supplement: gutjnl-2014-308553-s3.pdf [file gutjnl-2014-308553-s3.pdf]

Figure S1

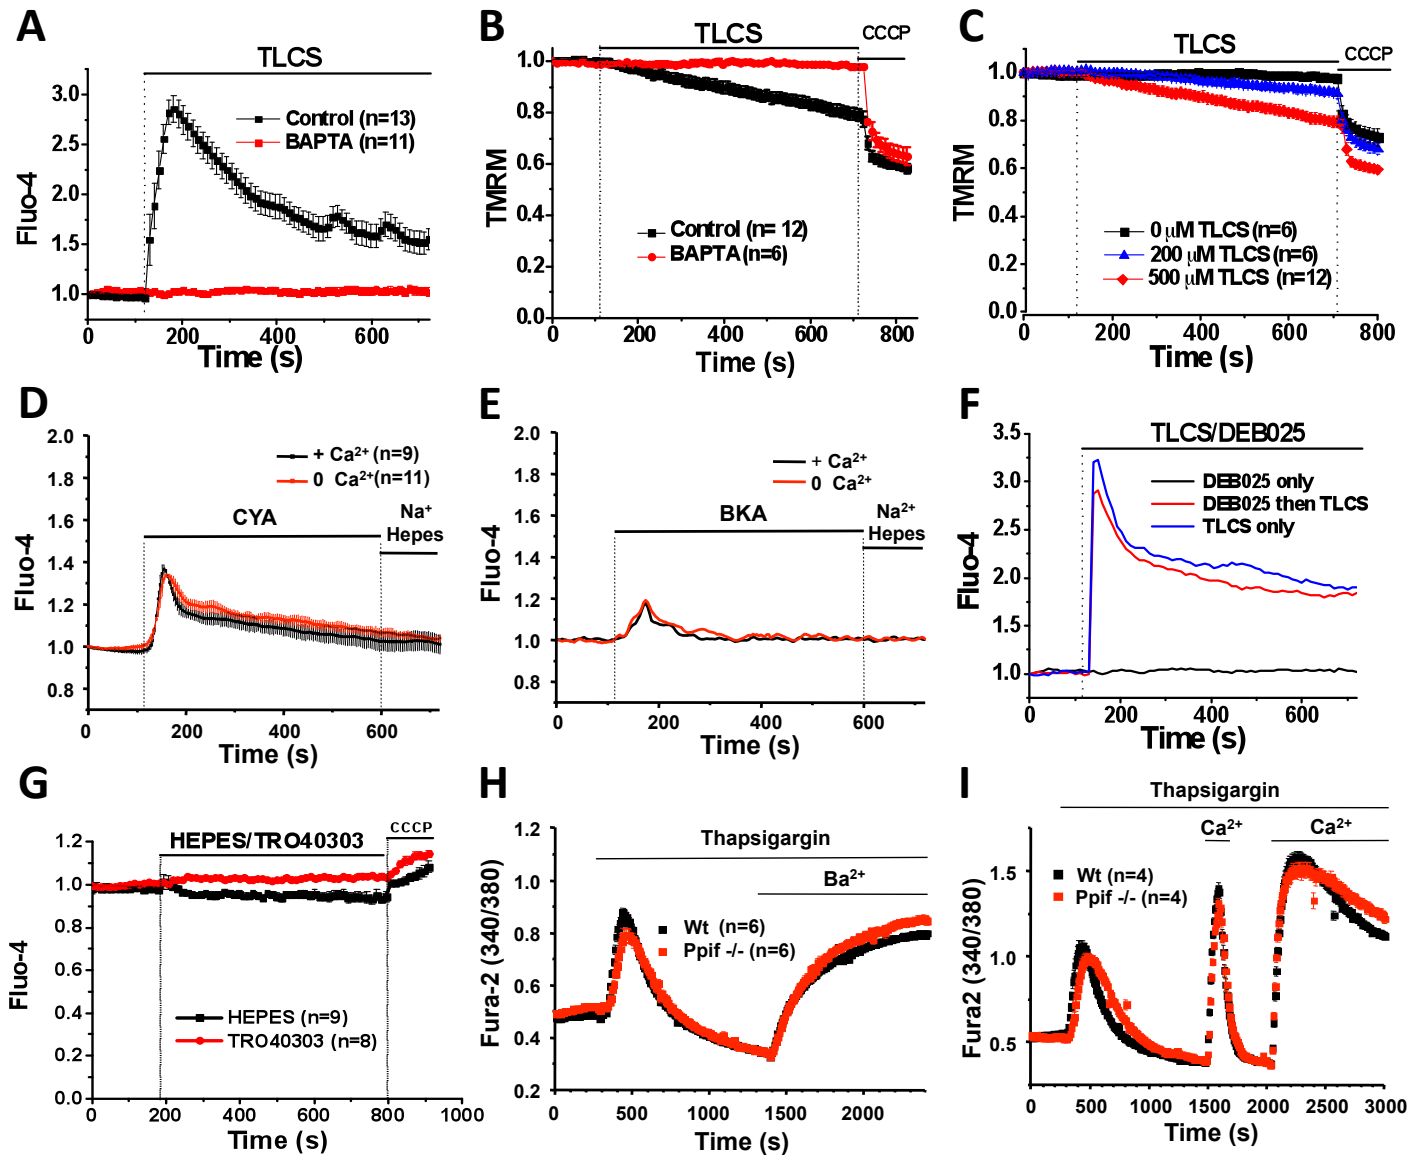

**Figure S1.** Effects of TLCS and pharmacological or genetic MPTP inhibition on cytosolic calcium (Fluo-4 or Fura-2) and mitochondrial membrane potential (TMRM) responses of murine pancreatic acinar cells (mean  $\pm$  s.e.m. ratio to basal,  $F/F_0$ ;  $n$  = no. of experiments, each with many cells). **(A)** Effect of preloading with calcium chelator BAPTA on calcium and **(B)**  $\Delta\psi_m$  responses to TLCS (500  $\mu$ M) in comparison to cells without BAPTA. **(C)** Effect of TLCS on  $\Delta\psi_m$  was dose dependent; the higher the concentration of TLCS, the greater the fall of  $\Delta\psi_m$ . **(D)** CYA-induced intracellular calcium release on first application of CYA, without (100 nM EGTA) or with extracellular calcium; **(E)** typical traces of BKA-induced calcium release without (100 nM EGTA) or with calcium. **(F)** DEB025 alone induced no cytosolic calcium change; DEB025 as pre-treatment followed by TLCS (labelled: DEB025 then TLCS) resulted in the same calcium changes as with TLCS only. **(G)** TRO40303 did not affect cytosolic calcium levels (CCCP protonophore control). **(H)** Calcium store depletion with thapsigargin (20  $\mu$ M) in zero Ca<sup>2+</sup> (100 nM EGTA) followed by extracellular barium (10 mM) entry (which is not extruded) showing similar entry rates in Wt and *Ppif*<sup>-/-</sup> cells confirmed in **(I)** with similar store depletion in zero Ca<sup>2+</sup> followed by extracellular calcium (5 mM) entry, extrusion and re-entry in Wt and *Ppif*<sup>-/-</sup> cells (H and I mean  $\pm$  s.e.m. ratio to basal,  $F/F_0$ ).

**Figure S2.** Factors determining toxic globalisation of second messenger calcium release in response to pancreatitis toxins (*insets*, green Fluo-4 or red PI fluorescent cells, white bars = 10  $\mu\text{m}$ ). **(A)** *Top plot*: typical calcium spikes (Fluo-4,  $F/F_0$ , blue) elicited by patched  $\text{IP}_3$  (1-10  $\mu\text{M}$ ) were transformed into global, prolonged elevations matched by  $\text{ICl}_{\text{Ca}}$  and non-specific cation currents upon POAEE (10  $\mu\text{M}$ ) application, inhibited by caffeine (Caf, pink); *middle plot*: sustained caffeine inhibition prevented toxic transformation and PI uptake from TLCS (10  $\mu\text{M}$ ) after  $\text{IP}_3$ ; *bottom plot*: caffeine prevented toxic transformation and PI uptake from POAEE (10  $\mu\text{M}$ ) after  $\text{IP}_3$ . **(B)** Without external calcium, globalised signals ( $\text{ICl}_{\text{Ca}}$ ) from POAEE after  $\text{IP}_3$  decreased then disappeared, with no PI uptake. **(C)** TLCS (10  $\mu\text{M}$ ) induced toxic transformation of typical  $\text{ICl}_{\text{Ca}}$  elicited by cADPR (10  $\mu\text{M}$ ) not NAADP (100 nM) whereas POAEE (10  $\mu\text{M}$ ) induced toxic globalisation with NAADP (100 nM) not cADPR (10  $\mu\text{M}$ ); following transformation, early PI uptake prevented by patched ATP (red  $\text{ICl}_{\text{Ca}}$  with PI uptake, 0 mM ATP; black  $\text{ICl}_{\text{Ca}}$  no PI uptake, 4 mM ATP; two recordings superimposed in top and bottom plots). **(D)** *Top plot*: TLCS (10  $\mu\text{M}$ ) induced toxic globalisation of CCK-8- (1-5 pM) elicited calcium signals with PI uptake; *bottom plot*: control data showing no change in ATP (Mg Green) with patch, but decline after CCCP. **(E)** CCK-8 or ACh with TLCS (10  $\mu\text{M}$ ) or POAEE (10  $\mu\text{M}$ ) resulted in significantly increased PI uptake compared to TLCS ( $*p < 0.05$ ) or POAEE ( $\dagger p < 0.05$ ) alone, without patch.

Figure S2

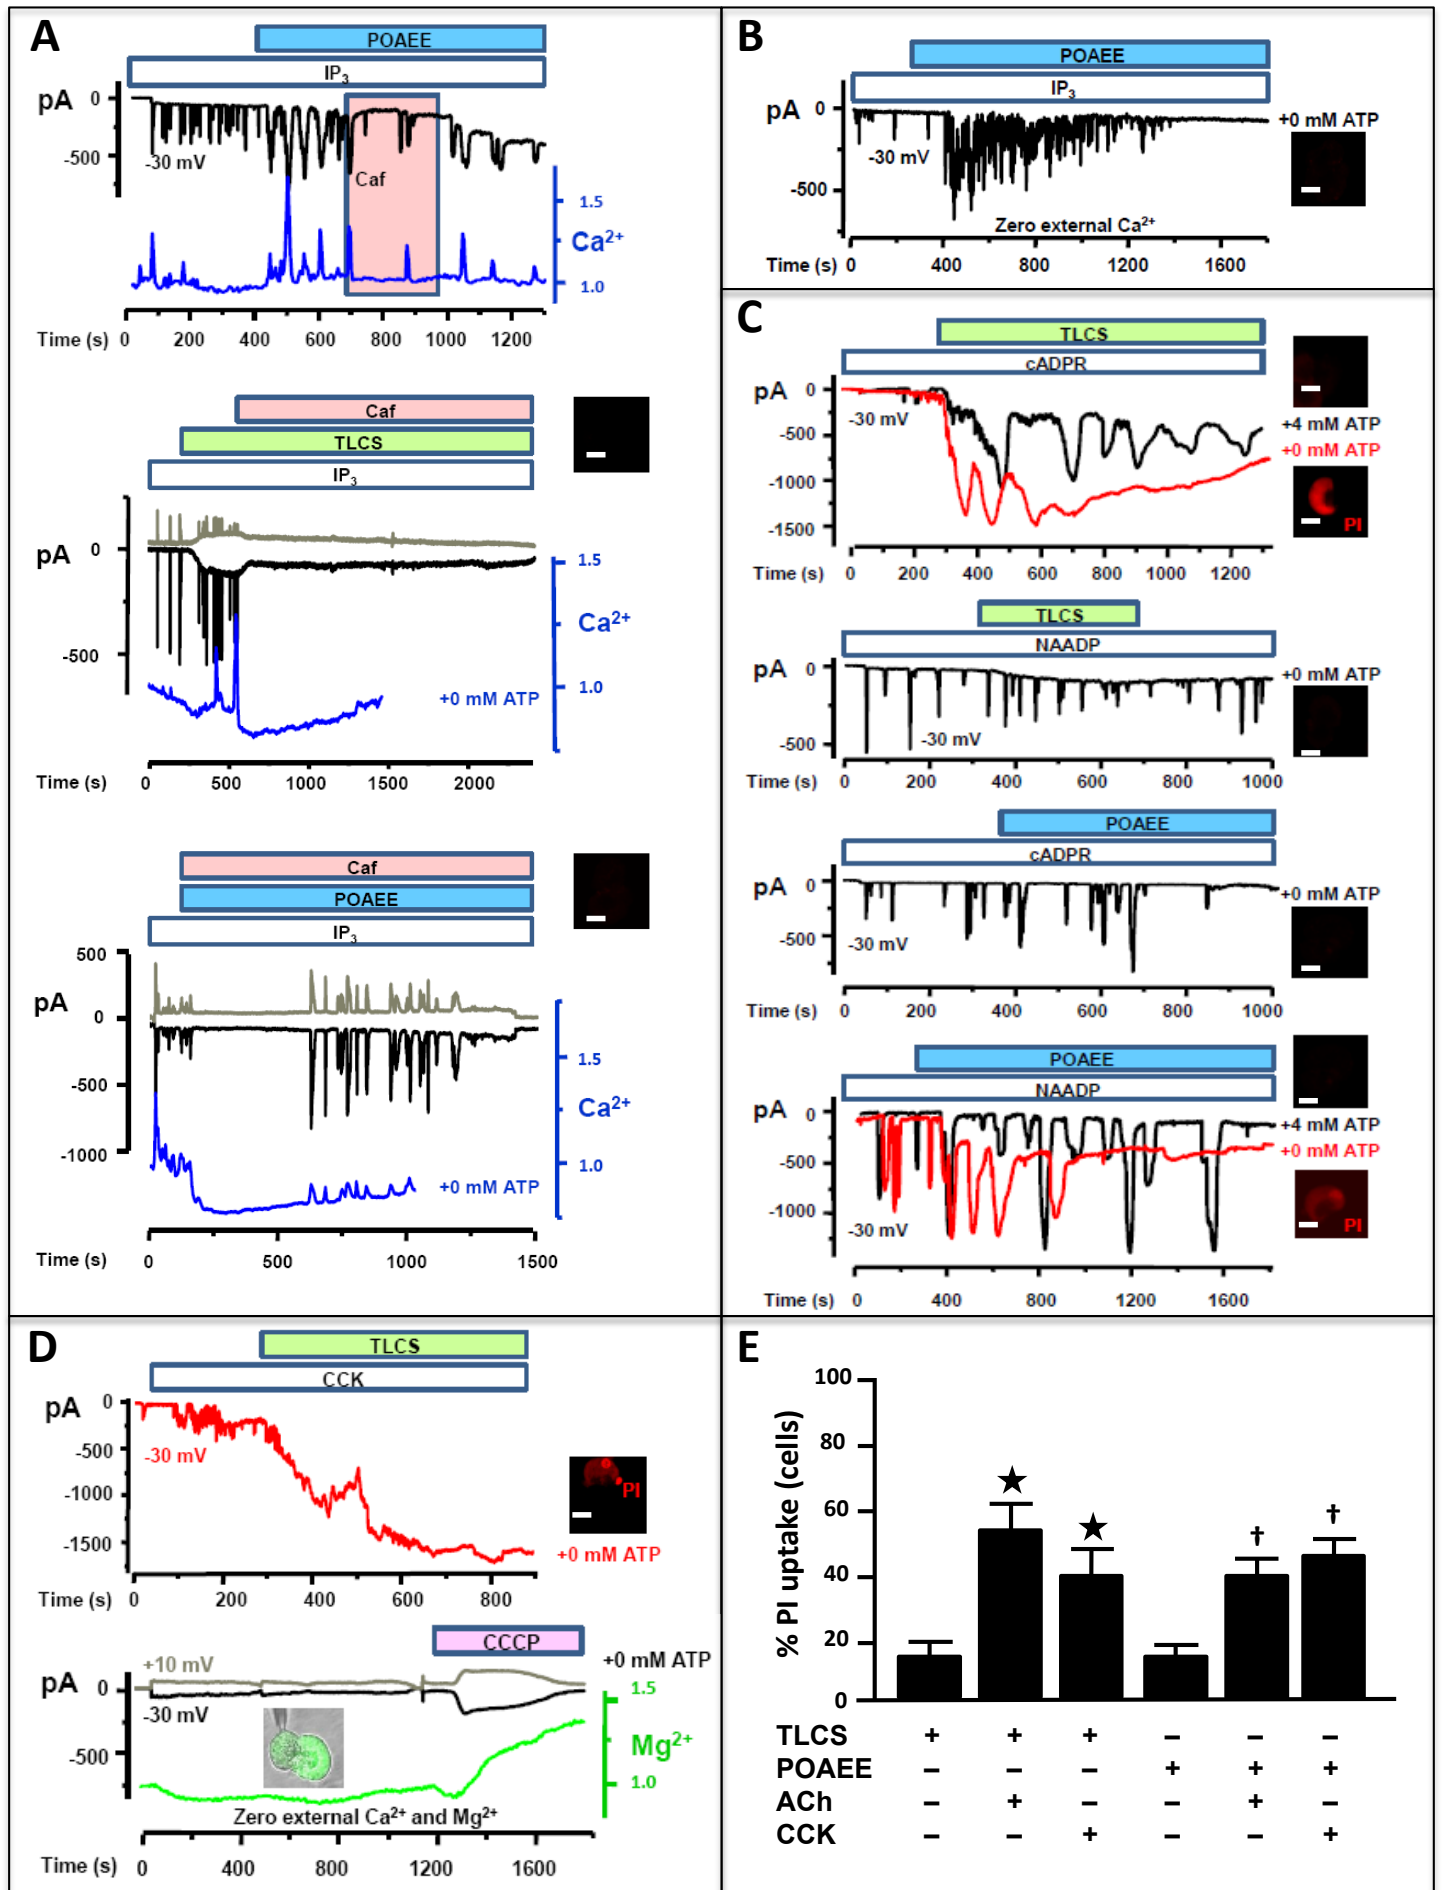

Figure S3

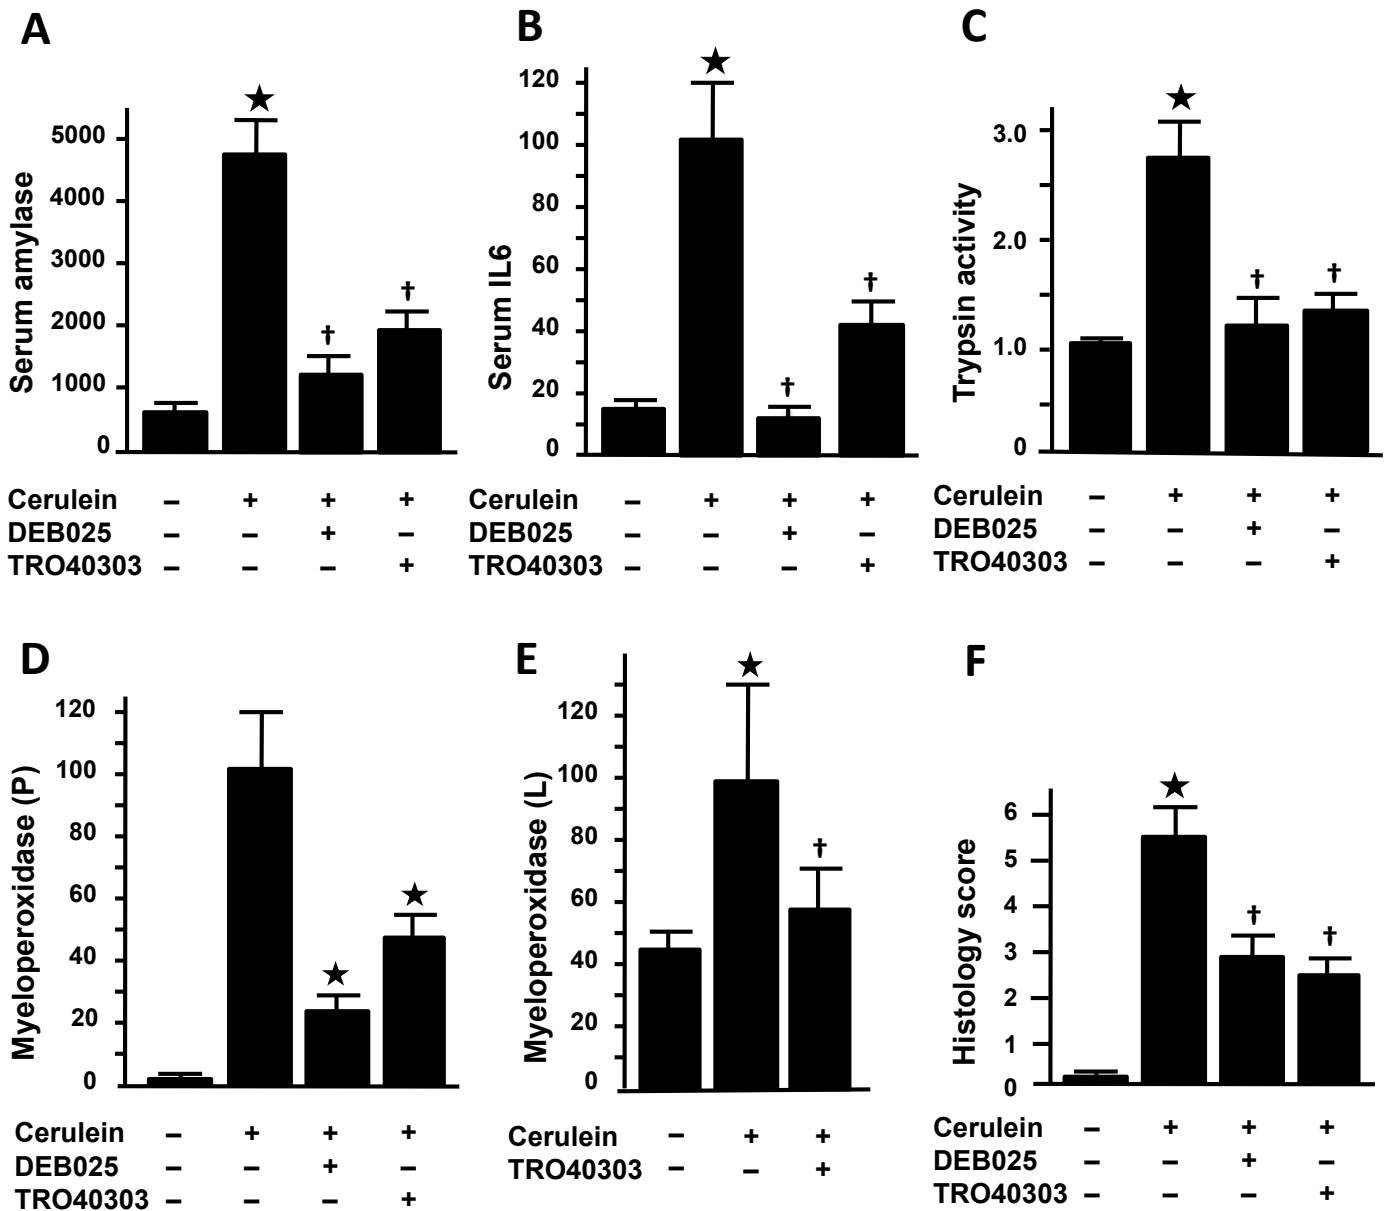

**Figure S3.** Pharmacological MPTP inhibition with DEB025 or TRO40303 markedly attenuates biochemical and histological responses of CER-AP in Wt mice. Characteristic elevations in CER-AP of (A) serum amylase (U/l) and (B) IL-6 (pg/ml), (C) pancreatic trypsin activity (normalized to saline controls at 1.0), (D) pancreatic (P) and (E) lung (L) myeloperoxidase activity (normalized to CER-AP at 100) and (F) histology scores (oedema, inflammatory infiltrate and necrosis) were all significantly reduced by treatment with DEB025 or TRO40303 (\* $p < 0.05$  for all elevations vs saline controls; † $p < 0.05$  vs CER-AP without treatment).

Figure S4

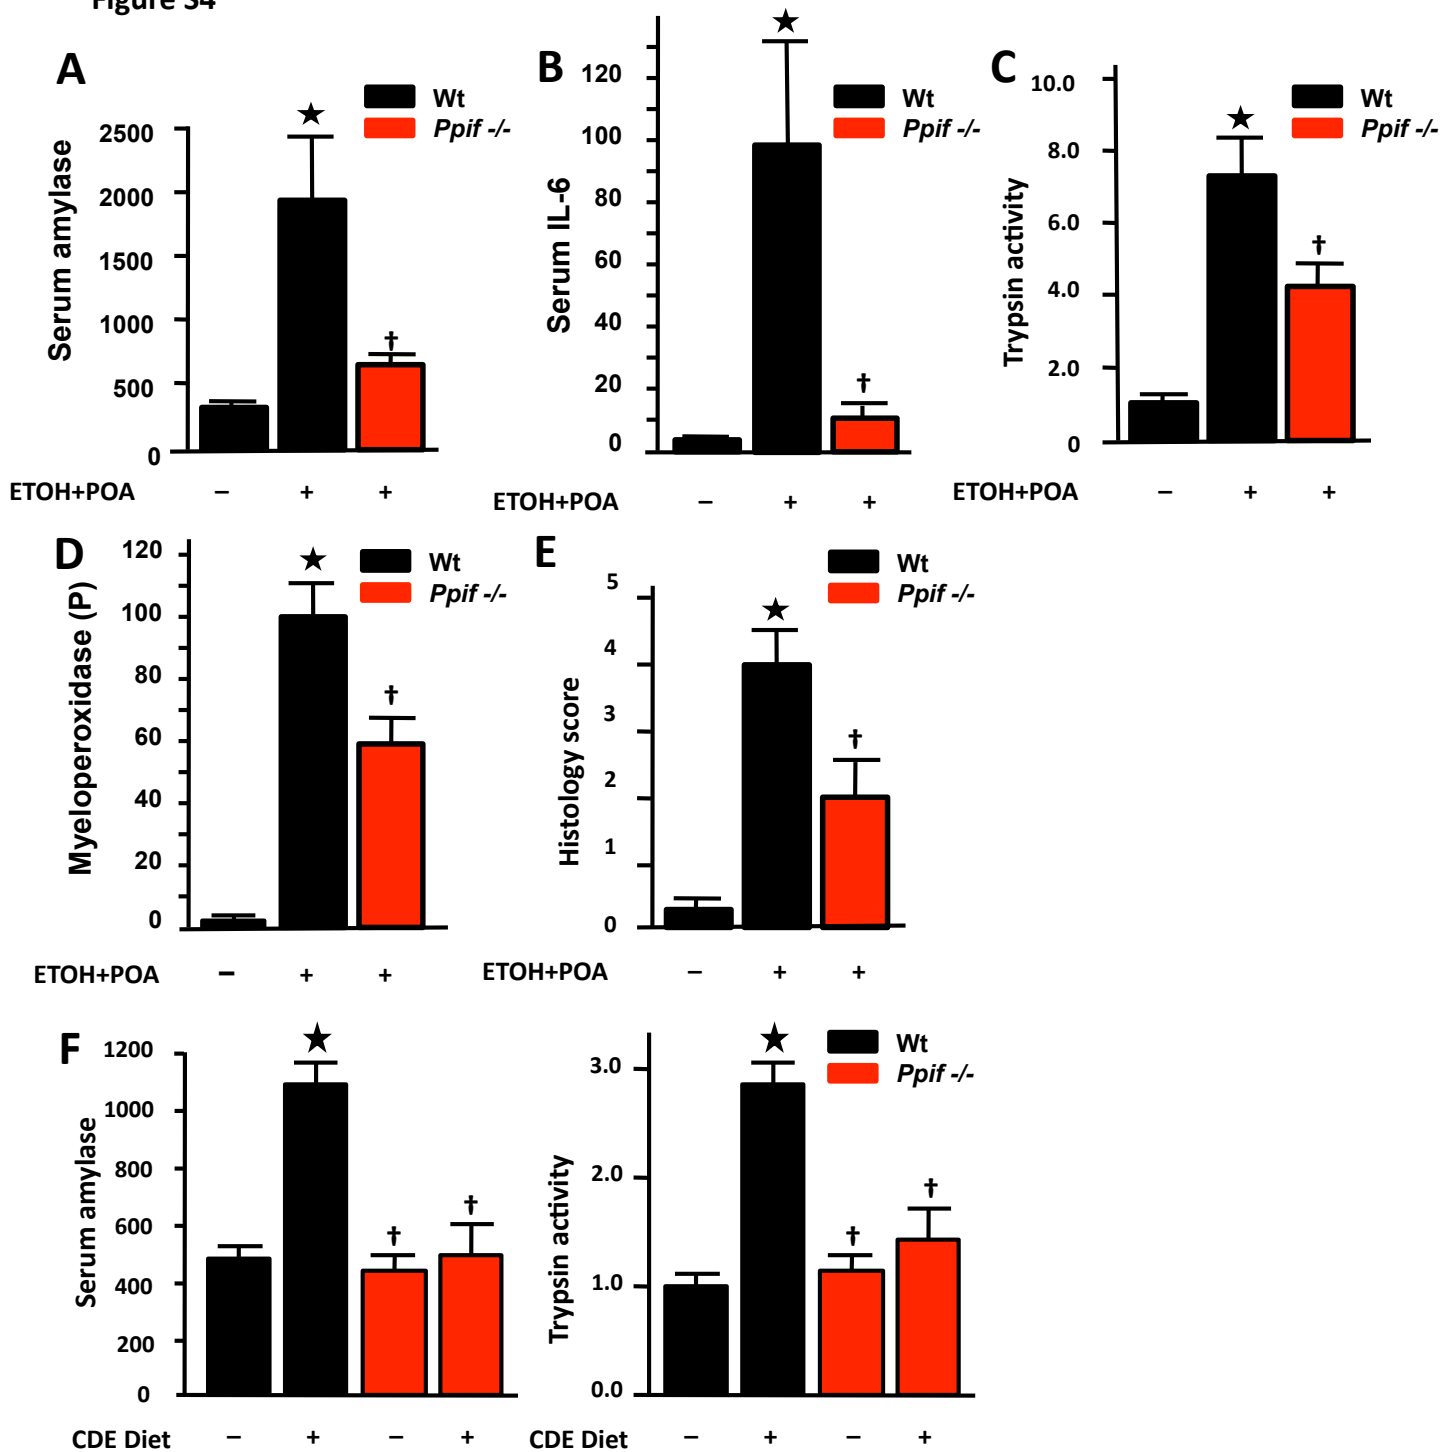

**Figure S4.** Genetic MPTP inhibition (*Ppif*<sup>-/-</sup>) markedly attenuates biochemical and histological responses of FAEE-AP and CDE-AP. Characteristic elevations in FAEE-AP (Huang et al., 2013) of (A) serum amylase (U/l) and (B) IL-6 (pg/ml), (C) pancreatic trypsin activity (normalized to saline controls at 1.0), (D) pancreatic (P) myeloperoxidase activity (normalized to FAEE-AP at 100) and (E) histology scores (\*p<0.05 vs Wt saline controls) were all significantly attenuated in *Ppif*<sup>-/-</sup> mice (†p<0.05 vs FAEE-AP in Wt). Characteristic elevations in CDE-AP of (F) serum amylase (left) and pancreatic trypsin activity (normalized to Wt controls receiving normal diet; \*p<0.05 vs Wt controls, right) were abolished in *Ppif*<sup>-/-</sup> animals (†p<0.05 vs CDE-AP in Wt).
