# Supplementary material
Source: PubMed Central journal article supplement (PMC4975830)
Supplement: gutjnl-2014-308553-s4.pdf [file gutjnl-2014-308553-s4.pdf]

**Table S1**

| Cells               | Stimulus                     | Toxin            | Caffeine | Pipette ATP | Globalisation <sup>a</sup> | PI uptake            |
|---------------------|------------------------------|------------------|----------|-------------|----------------------------|----------------------|
| Wt                  | 1-10 $\mu$ M IP <sub>3</sub> | 10 $\mu$ M TLCS  |          |             | 6 of 6                     | 5 of 6               |
| Wt                  | 1-10 $\mu$ M IP <sub>3</sub> | 10 $\mu$ M POAEE |          |             | 9 of 9                     | 8 of 9               |
| Wt                  | 1-10 $\mu$ M IP <sub>3</sub> | 10 $\mu$ M TLCS  | 20 mM    |             | 0 of 6                     | 0 of 6 <sup>b</sup>  |
| Wt                  | 1-10 $\mu$ M IP <sub>3</sub> | 10 $\mu$ M POAEE | 20 mM    |             | 1 of 6                     | 1 of 6 <sup>c</sup>  |
| Wt <sup>d</sup>     | 1-10 $\mu$ M IP <sub>3</sub> | 10 $\mu$ M TLCS  |          |             | 7 of 7 <sup>e</sup>        | 1 of 7 <sup>c</sup>  |
| Wt <sup>d</sup>     | 1-10 $\mu$ M IP <sub>3</sub> | 10 $\mu$ M POAEE |          |             | 7 of 7 <sup>e</sup>        | 0 of 7 <sup>b</sup>  |
| Wt                  | 1-10 $\mu$ M IP <sub>3</sub> | 10 $\mu$ M TLCS  |          | 4 mM        | 4 of 4 <sup>e</sup>        | 0 of 4 <sup>c</sup>  |
| Wt                  | 1-10 $\mu$ M IP <sub>3</sub> | 10 $\mu$ M POAEE |          | 4 mM        | 4 of 4 <sup>e</sup>        | 0 of 4 <sup>c</sup>  |
| Ppif <sup>-/-</sup> | 1-10 $\mu$ M IP <sub>3</sub> | 10 $\mu$ M TLCS  |          |             | 17 of 17 <sup>e</sup>      | 0 of 17 <sup>b</sup> |
| Wt                  | 100nM NAADP                  | 10 $\mu$ M TLCS  |          |             | 1 of 13                    | N/A                  |
| Wt                  | 100nM NAADP                  | 10 $\mu$ M POAEE |          |             | 9 of 9                     | 8 of 9               |
| Wt                  | 100nM NAADP                  | 10 $\mu$ M POAEE |          | 4 mM        | 5 of 5 <sup>e</sup>        | 0 of 5 <sup>b</sup>  |
| Wt                  | 10 $\mu$ M cADPR             | 10 $\mu$ M TLCS  |          |             | 5 of 5                     | 5 of 5               |
| Wt                  | 10 $\mu$ M cADPR             | 10 $\mu$ M TLCS  |          | 4 mM        | 4 of 4 <sup>e</sup>        | 0 of 4 <sup>b</sup>  |
| Wt                  | 10 $\mu$ M cADPR             | 10 $\mu$ M POAEE |          |             | 0 of 12                    | N/A                  |
| Wt                  | 1-5 pM CCK-8                 | 10 $\mu$ M TLCS  |          |             | 6 of 6                     | 6 of 6               |
| Wt                  | 1-5 pM CCK-8                 | 10 $\mu$ M TLCS  |          | 4 mM        | 6 of 6 <sup>e</sup>        | 0 of 6 <sup>b</sup>  |
| Wt                  | 1-5 pM CCK-8                 | 10 $\mu$ M POAEE |          |             | 7 of 7                     | 7 of 7               |
| Wt                  | 1-5 pM CCK-8                 | 10 $\mu$ M POAEE |          | 4 mM        | 5 of 5 <sup>e</sup>        | 0 of 5 <sup>b</sup>  |
| Wt                  | 20 nM ACh                    | 10 $\mu$ M TLCS  |          |             | 5 of 5                     | 5 of 5               |
| Wt                  | 20 nM ACh                    | 10 $\mu$ M TLCS  |          | 4 mM        | 5 of 5 <sup>e</sup>        | 0 of 5 <sup>b</sup>  |
| Wt                  | 20 nM ACh                    | 10 $\mu$ M POAEE |          |             | 6 of 6                     | 6 of 6               |
| Wt                  | 20 nM ACh                    | 10 $\mu$ M POAEE |          | 4 mM        | 6 of 6 <sup>e</sup>        | 0 of 6 <sup>b</sup>  |
| Wt                  |                              | 200 $\mu$ M TLCS |          |             | 7 of 7                     | 6 of 7               |
| Wt                  |                              | 200 $\mu$ M TLCS |          | 4 mM        | 7 of 7 <sup>e</sup>        | 0 of 7 <sup>b</sup>  |
| Ppif <sup>-/-</sup> |                              | 200 $\mu$ M TLCS |          |             | 7 of 7 <sup>e</sup>        | 0 of 7 <sup>b</sup>  |

**Table S1.** Toxic globalisation of calcium signals and subsequent PI uptake elicited by quasi-physiological stimuli following application of pancreatitis toxins in Wt mouse pancreatic acinar cells, demonstrating protective effects of the IP<sub>3</sub>R inhibitor caffeine or of no external calcium or of supplementary ATP in the pipette or of cyclophilin D knockout (*Ppif*<sup>-/-</sup>; numbers of cells less than those given in main text as PI uptake was not tested in all cells from which ICl<sub>Ca</sub> recordings were made).

<sup>a</sup>Globalisation characterised by transformation of apical into global calcium signals of >30 s duration.

<sup>b</sup>p<0.01 vs PI uptake in cells from respective Wt control group (i.e. calcium in external medium and no caffeine nor supplementary pipette ATP).

<sup>c</sup>p<0.05 vs PI uptake in cells from respective Wt control group (i.e. calcium in external medium with no caffeine nor supplementary pipette ATP).

<sup>d</sup>0 mM external calcium, demonstrating protection from PI uptake, as globalisation was not sustained in cells with external medium containing no calcium.

<sup>e</sup>Globalisation less marked/not sustained with no external calcium or with supplementary pipette ATP or in *Ppif*<sup>-/-</sup>, showing return to baseline cytosolic calcium levels.
